# Supplementary material
Source: HighWire-hosted journal article supplement (https://gh.bmj.com/content/8/7/e011801)
Supplement: inline-supplementary-material-1 [file inline-supplementary-material-1.pdf]

1 **Supplementary materials**

2 **Excess mortality associated with the COVID-19 pandemic during the 2020 and 2021 waves in**  
3 **Antananarivo, Madagascar**

4 J.H. Rabarison MD<sup>1\*</sup>, J.M. Rakotondramanga MSc<sup>2,3,4,5\*</sup>, R. Ratovoson PhD<sup>2#</sup>, B. Masquelier PhD<sup>6</sup>, A.M.  
5 Rasoanomenjanahary MD<sup>7</sup>, A. Dreyfus PhD<sup>2</sup>, A. Garchitorena PhD<sup>2,5</sup>, F. Rasambainarivo PhD<sup>8,9</sup>, N.H.  
6 Razanajatovo PhD<sup>1</sup>, S.F. Andriamandimby PhD<sup>1</sup>, C.J.E. Metcalf PhD<sup>8,10</sup>, V. Lacoste PhD<sup>1</sup>, J-M. Heraud PhD<sup>1q\$#</sup>,  
7 P. Dussart PhD<sup>1\$</sup>

8 **Content**

9 **Supplementary Methods S1–S3**

10 **Supplementary Figures S1–S6**

11 **Supplementary Tables S1–S4**

12

13

## 14 **Supplementary Methods**

### 15 **Method S1. The Bureau Municipal d'Hygiène (BMH) of Antananarivo**

16 This office was created in 1916 and covers five of the six central districts of Antananarivo-city, corresponding to  
17 the district of Antananarivo-Renivohitra. Its role has been to provide free consultations, conduct vaccination  
18 campaigns, manage malaria prophylaxis, and isolate patients with highly infectious diseases. Since 1921, the BMH  
19 has also been in charge of home verification of deaths. Historically, this system of death verification was motivated  
20 by recurrent plague epidemics but was maintained for the purpose of disease and outbreak surveillance. The 6<sup>th</sup>  
21 district (Ambohimarina) does not fall in the area covered by the BMH for historical reasons; this locality was  
22 an autonomous urban commune under the 1<sup>st</sup> Republic, from 1958–72. Community and hospital deaths are  
23 recorded in a single register as they are reported to the BMH. These certificates are mandatory to obtain burial  
24 authorization. This system contributes to maintaining a high completeness of death registration, estimated at over  
25 90% since the 1970s.[1]

26

27

### 28 **Method S2: Relative change method based on P-scores**

29 The expected deaths were derived from the period 2016 to 2019, and the corresponding relative change was  
30 computed as follows:[2]

$$31 \text{ Relative change (\%)} = \frac{\{\text{Reported deaths}\} - \{\text{Average expected deaths}\}}{\{\text{Average expected deaths}\}} * 100.$$

32 A relative change of 100%, in a given week in 2020 (or 2021), would mean that the death count for that week  
33 was double from the expected death count.

34

35

### 36 **Method S3: Mathematical background to cross-wavelet analyses**

37 Cross-wavelet analyses were performed twice in order to detect and quantify the existing relationships between  
38 (1) the log-transformed of all-cause deaths in Antananarivo and national COVID-19 deaths (supplementary Figure  
39 S1A and S1C),[3] and (2) the transformed square root of SARS-CoV-2 test positivity rate by the IPM laboratory  
40 and all-cause death rate in Antananarivo, (Supplementary Figure S1B and S1D), as non-stationary time series. The  
41 concepts of cross-wavelet coherency and wavelet phase difference are natural generalizations of the basic wavelet  
42 analysis tools that enable us to appropriately deal and conclude with the time-frequency dependencies between  
43 two time series.[4]

44 Cross-Wavelet Transform (XWT) of two time series,  $x(t)$  and  $y(t)$  is defined as

$$45 W_{xy} = W_x^* W_y^*,$$

46 Where  $W_x$  and  $W_y$  are the wavelet transforms of  $x$  and  $y$ , respectively. The cross-wavelet power (XWP) is

$$47 (XWP)_{xy} = |W_{xy}|.$$

48 Here, we can interpret the wavelet power spectrum to depict the local variance of a time series; the cross-wavelet  
 49 power of two time series depicts the local covariance between these time series at each time and frequency (the  
 50 inverse form of scale/period). Furthermore, the cross-wavelet power informs us about a quantified indication of  
 51 the similarity of power between two time series.

52 Then, given two time series  $x(t)$  and  $y(t)$ , their complex wavelet coherency can be defined as  $\rho_{xy}$  by:

$$53 \quad \rho_{xy} = \frac{S(w_{xy})}{[S(|w_x|^2)S(|w_y|^2)]^{1/2}},$$

54 where  $S$  denotes a smoothing operator in both time and scale (period). Without the smoothing, coherency would  
 55 be identically one at all scales and times. That needs an appropriate choice of parameters combination. So, Bartlett  
 56 window was used both for smoothing in time and scale (period) direction, without a detrending technique but with  
 57 a default method of generating surrogate time series, white-noise.[5]

58 Then, the complex wavelet coherency can be written in polar form, as  $\rho_{xy} = |\rho_{xy}|e^{i\Phi_{xy}}$ :[6]

59 - The absolute value of the complex wavelet coherency is called the wavelet coherency and is defined as,

$$60 \quad \text{Coherency} = R_{xy} = \frac{|S(w_{xy})|}{[S(|w_x|^2)S(|w_y|^2)]^{1/2}},$$

61 with  $0 \leq R_{xy} \leq 1$  across time and scale direction.

62 Thus, the cross-wavelet coherence of a complex wavelet is,

$$63 \quad \text{Coherence} = \text{Coherency}^2$$

64 - The angle of the complex coherency is called phase-difference (phase lead of  $x$  over  $y$ ), i.e.

$$65 \quad \Phi_{xy} = \left( \frac{\text{Im}(S(w_{xy}))}{\text{Re}(S(w_{xy}))} \right).$$

66 Thus, a phase-difference of zero indicates that the time series move together at the specified time-frequency; if  
 67  $\Phi_{xy} \in \left(0, \frac{\pi}{2}\right)$ , then the series move in phase, but  $x$  leads  $y$ ; if  $\Phi_{xy} \in \left(-\frac{\pi}{2}, 0\right)$ , then it is  $y$  that is leading  $x$ . A phase-  
 68 difference of  $\pi$  (or  $-\pi$ ) indicates an anti-phase relation; if  $\Phi_{xy} \in \left(\frac{\pi}{2}, \pi\right)$ , then  $y$  is leading;  $x$  is leading if  $\Phi_{xy} \in$   
 69  $\left(-\pi, -\frac{\pi}{2}\right)$ . This is illustrated by arrows directions as in Figure 3.[6]

## 70 References

- 71 1 Masquelier B, Pison G, Rakotonirina J, *et al.* Estimating cause-specific mortality in Madagascar: an  
 72 evaluation of death notification data from the capital city. *Popul Health Metr* 2019;**17**:8.
- 73 2 Serfling RE. Methods for Current Statistical Analysis of Excess Pneumonia-Influenza Deaths. *Public*  
 74 *Heal Reports* 1963;**78**:494.
- 75 3 Mathieu E, Ritchie H, Rodés-Guirao L, *et al.* Coronavirus Pandemic (COVID-19). *Our World Data*  
 76 2020.
- 77 4 Aguiar-Conraria L, Soares MJ. The Continuous Wavelet Transform: A Primer. 2011. Available:  
 78 <https://econpapers.repec.org/RePEc:nip:nipewp:16/2011>
- 79 5 Cazelles B, Chavez M, Berteaux D, *et al.* Wavelet analysis of ecological time series. *Oecologia*  
 80 2008;**156**:287–304.
- 81 6 Roesch A, Schmidbauer H. WaveletComp: Computational Wavelet Analysis. 2018. Available:

82 <https://cran.r-project.org/package=WaveletComp>  
83

84 **Supplementary Figures**

85

86

87

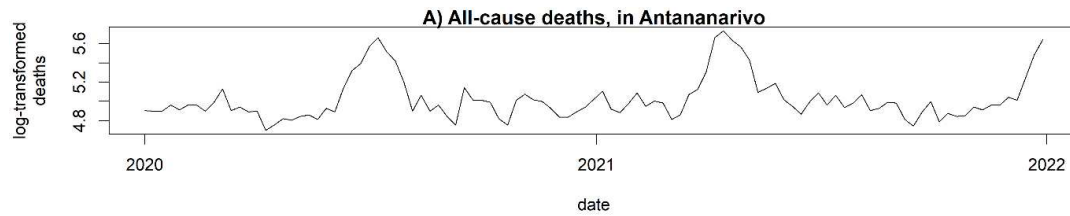

89

90

91

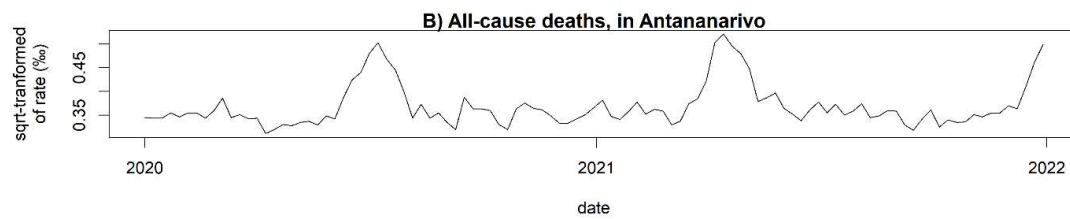

93

94

95

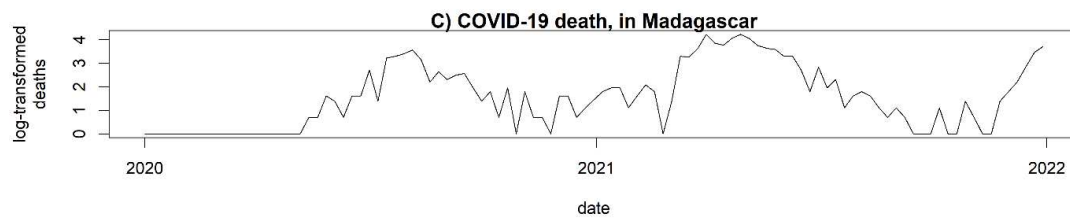

97

98

99

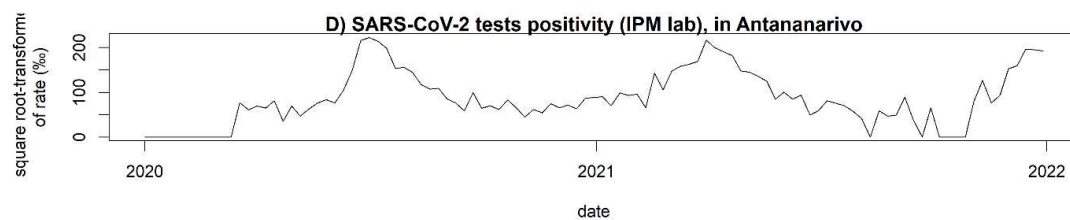

101

102

103 **Figure S1. Temporal trends from 2020–21 of transformed data used for the wavelet analyses, cross-wavelet**  
104 **coherence and phase-difference:** the log-transformed of all-cause deaths in Antananarivo and national COVID-  
105 19 deaths (panels A and C),[3] and the square root-transformed of SARS-CoV-2 test positivity rate by the IPM  
106 laboratory and all-cause death rate in Antananarivo (panels B and D).

107

108

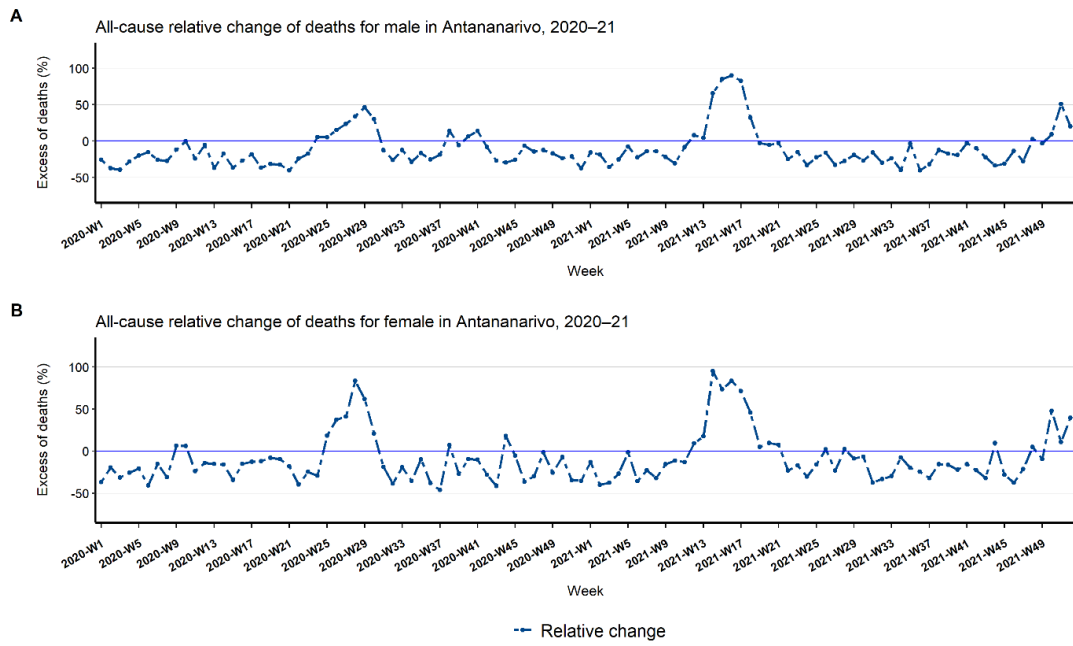

109

110 **Figure S2: Weekly excess mortality by sex: for (A) Male and (B) Female deaths.**

111

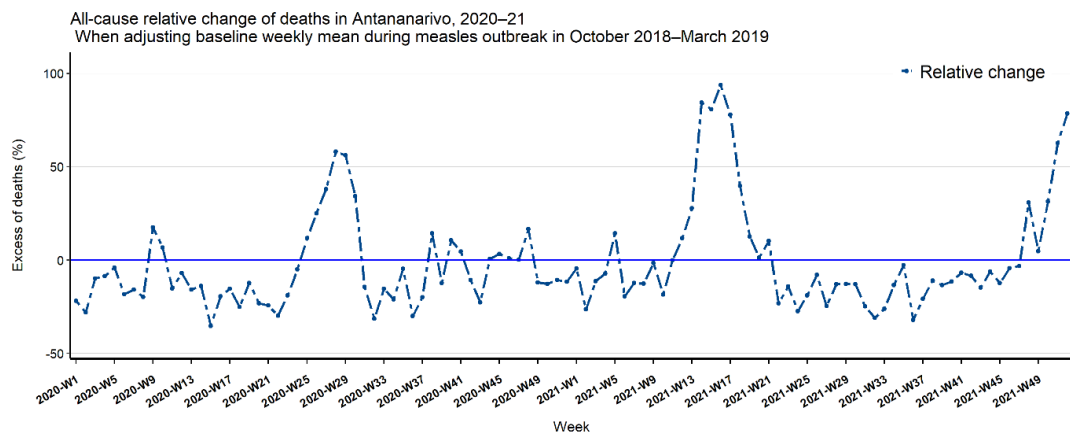

112

113 **Figure S3. Weekly temporal trends, in five districts of Antananarivo from 2020–21.** All-causes excess deaths  
114 were calculated using 2016–19 adjusted deaths as baseline (death from October 2018 to March 2019 was not  
115 considered due to measles outbreak affecting Antananarivo). Significant all-cause excess mortality was estimated  
116 during waves of COVID-19 in both 2020 and 2021 in Antananarivo: totalling 1,499 deaths for 32 weeks. (95 %  
117 CI is indicated in grey)

118

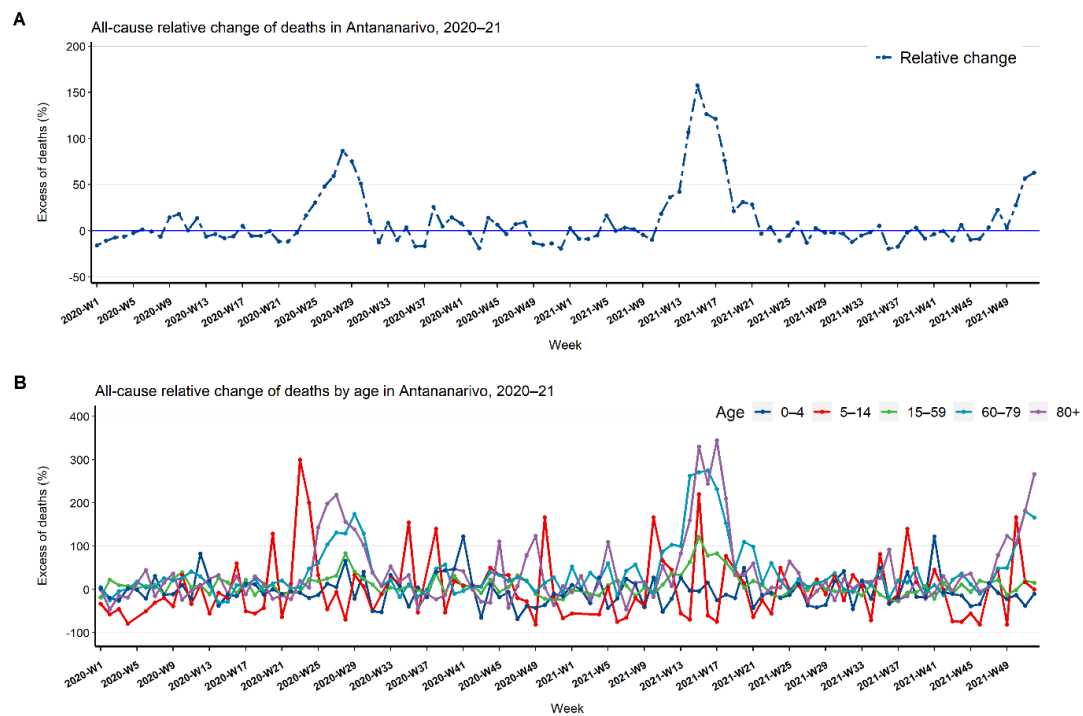

119

120 **Figure S4. Weekly temporal trends using a relative change method based on P-scores, in five districts of**  
 121 **Antananarivo from 2020–21. (a) All-cause excess mortality using 2016–19 crude deaths as baseline years,**  
 122 **totalling 2,111 deaths for 51 weeks. (b) All-cause excess mortality by age group using 2016–19 crude deaths as**  
 123 **baseline years; the excess mortality was estimated at over 200% for the elderly (80+) for each wave (no death**  
 124 **record was observed for age group 5–14 age during one week in 2020 and two weeks in 2021). Supplementary**  
 125 **Table S1 Supplementary materials representing weekly all-cause deaths by age group supports this figure.**

126

127



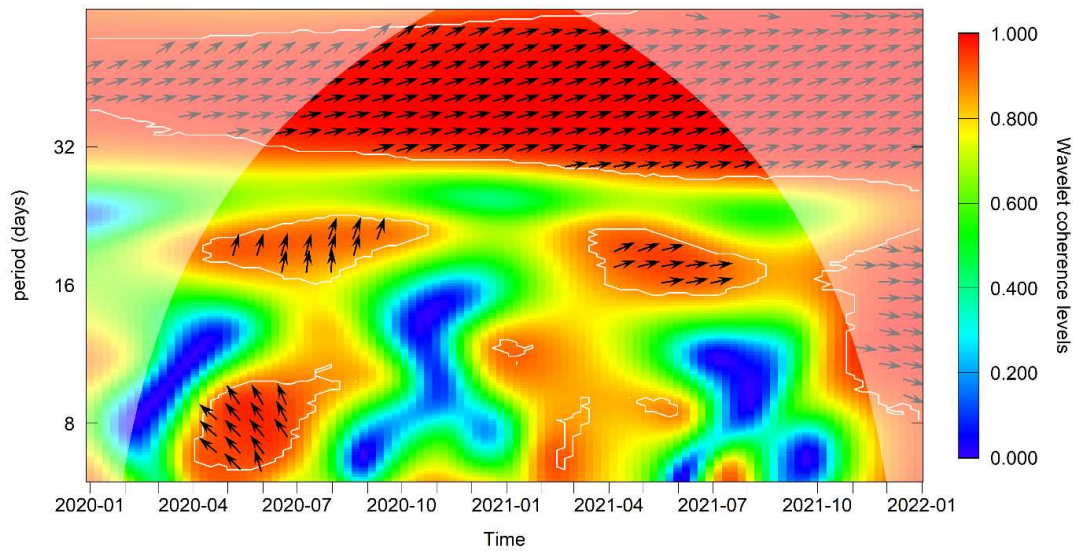

128

129 **Figure S5: Cross-wavelet coherence and phase-difference of the all-cause deaths in Antananarivo and**  
130 **national COVID-19 deaths.**[3] This figure shows that these two time series were out of phase, phase-differences  
131  $\in (\frac{\pi}{2}, \pi)$ ; and the weekly national COVID-19 deaths led the Antananarivo deaths. However, from the 2<sup>nd</sup> half of  
132 2020 to September 2021, the all-cause deaths in Antananarivo were mainly in phase and led the national COVID-  
133 19 deaths, phase-differences  $\in (0, \frac{\pi}{2})$ . The significant coherence level is ranked from blue–red colour scale, and  
134 statistically significant wavelet coherence is marked by the white contour plots when p-value < 0.05. This figure  
135 is supported by the Method S3, Figure S1A and S1C.

136

137

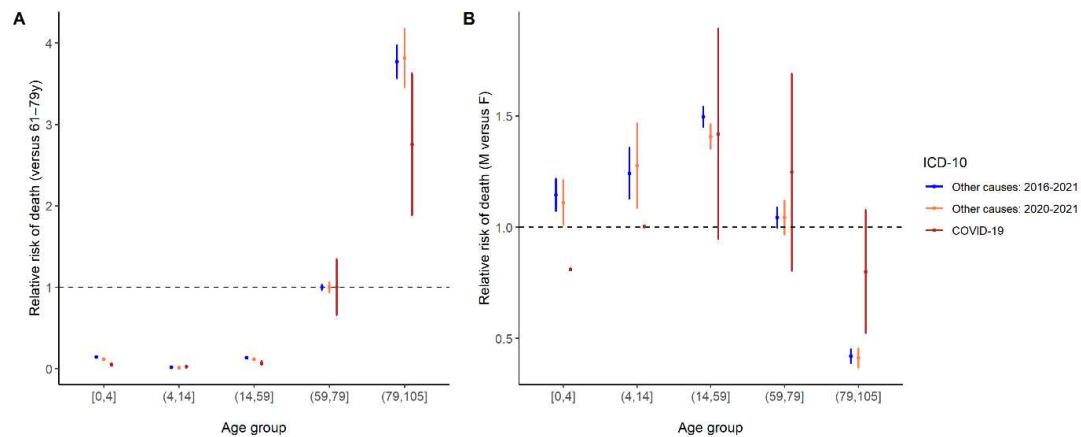

138

139

**Figure S6. Relative risk ratios of COVID-19 and other causes of death, for each age group, (A) versus 60–**

140

79y, and (B) for Male (versus Female). The vertical bars represent confidence intervals. In 2020–2021, COVID-

141

19 infection induced a significantly higher risk of death for the elderly aged 80+ compared to persons aged 60–79

142

years of age, with a risk ratio (RR) = 2.8 (IC95% 1.9–3.6) (panel A). A similar relative risk of dying from COVID-

143

19 was observed for men and women in these two age groups, in comparison to other causes of deaths in the same

144

period. That showed lesser risk for men 80+ years of age, RR = 0.4 (0.36–0.46) (panel B).

145

146 **Supplementary Tables**147 **Table S1: Weekly mortality data in Antananarivo, 2016–2021.**

| Year | Age      | Mean  | SD    |
|------|----------|-------|-------|
| 2016 | [0,4]    | 11.1  | 4.74  |
| 2016 | (4,14]   | 3.02  | 1.63  |
| 2016 | (14,59]  | 61.27 | 7.97  |
| 2016 | (59,79]  | 33.17 | 5.87  |
| 2016 | (79,105] | 12.4  | 3.81  |
| 2017 | [0,4]    | 11.73 | 3.75  |
| 2017 | (4,14]   | 2.9   | 1.49  |
| 2017 | (14,59]  | 62.31 | 12.15 |
| 2017 | (59,79]  | 35.83 | 7.48  |
| 2017 | (79,105] | 12.25 | 4.41  |
| 2018 | [0,4]    | 17    | 10.14 |
| 2018 | (4,14]   | 3.92  | 2.51  |
| 2018 | (14,59]  | 68.87 | 15.96 |
| 2018 | (59,79]  | 37.69 | 8.43  |
| 2018 | (79,105] | 12.5  | 3.62  |
| 2019 | [0,4]    | 16.12 | 5.9   |
| 2019 | (4,14]   | 3.98  | 1.96  |
| 2019 | (14,59]  | 69.23 | 11.44 |
| 2019 | (59,79]  | 42.62 | 8.04  |
| 2019 | (79,105] | 15.19 | 4.29  |
| 2020 | [0,4]    | 13.21 | 4.13  |
| 2020 | (4,14]   | 3.18  | 1.82  |
| 2020 | (14,59]  | 70.62 | 12.99 |
| 2020 | (59,79]  | 46.96 | 19.25 |
| 2020 | (79,105] | 16.63 | 9.38  |
| 2021 | [0,4]    | 12.75 | 3.92  |
| 2021 | (4,14]   | 2.96  | 1.63  |
| 2021 | (14,59]  | 71.21 | 15.09 |
| 2021 | (59,79]  | 57.29 | 25.45 |
| 2021 | (79,105] | 19.1  | 9.49  |

148

149

150

151

152

153 **Table S2: Weekly mortality data and excess deaths in Antananarivo, 2020-2021.** Data shows estimated all-  
 154 age excess mortality using positive lower bounds of relative change, the difference between weekly reported deaths  
 155 in 2020–2021 and the upper bounds of 95%CI of the average expected deaths.

| Week | Year | Reported deaths | Average expected deaths (2016–2019) |        |        | Death excesses by relative change |
|------|------|-----------------|-------------------------------------|--------|--------|-----------------------------------|
|      |      |                 | Mean                                | CI Low | CI Up  |                                   |
| 1    | 2020 | 135             | 160.25                              | 134.22 | 186.28 | -27.53                            |
| 2    | 2020 | 134             | 150.25                              | 110.81 | 189.69 | -29.36                            |
| 3    | 2020 | 134             | 144.50                              | 82.02  | 206.98 | -35.26                            |
| 4    | 2020 | 143             | 152.50                              | 121.41 | 183.59 | -22.11                            |
| 5    | 2020 | 136             | 139.25                              | 111.80 | 166.70 | -18.42                            |
| 6    | 2020 | 143             | 141.00                              | 83.80  | 198.20 | -27.85                            |
| 7    | 2020 | 143             | 144.25                              | 111.40 | 177.10 | -19.26                            |
| 8    | 2020 | 134             | 143.50                              | 101.07 | 185.93 | -27.93                            |
| 9    | 2020 | 147             | 128.50                              | 115.22 | 141.78 | 3.68                              |
| 10   | 2020 | 169             | 143.25                              | 128.94 | 157.56 | 7.26                              |
| 11   | 2020 | 135             | 134.25                              | 91.96  | 176.54 | -23.53                            |
| 12   | 2020 | 140             | 123.25                              | 97.29  | 149.21 | -6.18                             |
| 13   | 2020 | 133             | 142.00                              | 104.82 | 179.18 | -25.77                            |
| 14   | 2020 | 134             | 138.75                              | 121.79 | 155.71 | -13.94                            |
| 15   | 2020 | 110             | 119.50                              | 68.64  | 170.36 | -35.43                            |
| 16   | 2020 | 116             | 123.25                              | 102.57 | 143.93 | -19.41                            |
| 17   | 2020 | 124             | 118.00                              | 89.36  | 146.64 | -15.44                            |
| 18   | 2020 | 122             | 129.50                              | 95.91  | 163.09 | -25.20                            |
| 19   | 2020 | 127             | 134.25                              | 123.59 | 144.91 | -12.36                            |
| 20   | 2020 | 129             | 129.50                              | 91.10  | 167.90 | -23.17                            |
| 21   | 2020 | 123             | 139.25                              | 116.03 | 162.47 | -24.29                            |
| 22   | 2020 | 138             | 156.25                              | 115.99 | 196.51 | -29.78                            |
| 23   | 2020 | 133             | 135.75                              | 107.33 | 164.17 | -18.98                            |
| 24   | 2020 | 170             | 145.75                              | 112.54 | 178.96 | -5.01                             |
| 25   | 2020 | 204             | 156.00                              | 129.31 | 182.69 | 11.66                             |
| 26   | 2020 | 220             | 148.75                              | 121.45 | 176.05 | 24.97                             |
| 27   | 2020 | 262             | 164.25                              | 138.58 | 189.92 | 37.95                             |
| 28   | 2020 | 287             | 153.75                              | 125.93 | 181.57 | 58.07                             |
| 29   | 2020 | 249             | 142.00                              | 124.52 | 159.48 | 56.13                             |
| 30   | 2020 | 225             | 148.75                              | 129.86 | 167.64 | 34.22                             |
| 31   | 2020 | 181             | 164.00                              | 116.39 | 211.61 | -14.47                            |
| 32   | 2020 | 134             | 153.50                              | 111.23 | 195.77 | -31.55                            |
| 33   | 2020 | 158             | 145.50                              | 104.14 | 186.86 | -15.45                            |
| 34   | 2020 | 134             | 149.25                              | 128.65 | 169.85 | -21.11                            |
| 35   | 2020 | 143             | 138.25                              | 126.46 | 150.04 | -4.69                             |
| 36   | 2020 | 127             | 152.75                              | 124.10 | 181.40 | -29.99                            |
| 37   | 2020 | 116             | 138.75                              | 132.47 | 145.03 | -20.02                            |
| 38   | 2020 | 171             | 136.00                              | 122.44 | 149.56 | 14.33                             |
| 39   | 2020 | 150             | 143.25                              | 115.53 | 170.97 | -12.27                            |
| 40   | 2020 | 150             | 131.00                              | 117.07 | 144.93 | 3.50                              |
| 41   | 2020 | 147             | 135.75                              | 131.00 | 140.50 | 4.63                              |
| 42   | 2020 | 124             | 127.50                              | 115.00 | 140.00 | -11.43                            |
| 43   | 2020 | 116             | 143.00                              | 116.34 | 169.66 | -31.63                            |
| 44   | 2020 | 150             | 131.75                              | 96.90  | 166.60 | -9.96                             |

|    |      |     |        |        |        |        |
|----|------|-----|--------|--------|--------|--------|
| 45 | 2020 | 160 | 150.25 | 121.89 | 178.61 | -10.42 |
| 46 | 2020 | 151 | 156.75 | 125.61 | 187.89 | -19.63 |
| 47 | 2020 | 148 | 138.00 | 87.97  | 188.03 | -21.29 |
| 48 | 2020 | 138 | 126.25 | 87.07  | 165.43 | -16.58 |
| 49 | 2020 | 126 | 145.25 | 95.89  | 194.61 | -35.26 |
| 50 | 2020 | 126 | 148.75 | 75.48  | 222.02 | -43.25 |
| 51 | 2020 | 133 | 154.25 | 108.00 | 200.50 | -33.67 |
| 52 | 2020 | 140 | 173.75 | 102.02 | 245.48 | -42.97 |
| 1  | 2021 | 165 | 160.25 | 134.22 | 186.28 | -11.42 |
| 2  | 2021 | 137 | 150.25 | 110.81 | 189.69 | -27.78 |
| 3  | 2021 | 132 | 144.50 | 82.02  | 206.98 | -36.23 |
| 4  | 2021 | 145 | 152.50 | 121.41 | 183.59 | -21.02 |
| 5  | 2021 | 162 | 139.25 | 111.80 | 166.70 | -2.82  |
| 6  | 2021 | 141 | 141.00 | 83.80  | 198.20 | -28.86 |
| 7  | 2021 | 149 | 144.25 | 111.40 | 177.10 | -15.87 |
| 8  | 2021 | 146 | 143.50 | 101.07 | 185.93 | -21.48 |
| 9  | 2021 | 123 | 128.50 | 115.22 | 141.78 | -13.25 |
| 10 | 2021 | 129 | 143.25 | 128.94 | 157.56 | -18.13 |
| 11 | 2021 | 159 | 134.25 | 91.96  | 176.54 | -9.93  |
| 12 | 2021 | 168 | 123.25 | 97.29  | 149.21 | 12.59  |
| 13 | 2021 | 202 | 142.00 | 104.82 | 179.18 | 12.73  |
| 14 | 2021 | 287 | 138.75 | 121.79 | 155.71 | 84.32  |
| 15 | 2021 | 308 | 119.50 | 68.64  | 170.36 | 80.79  |
| 16 | 2021 | 279 | 123.25 | 102.57 | 143.93 | 93.84  |
| 17 | 2021 | 261 | 118.00 | 89.36  | 146.64 | 77.98  |
| 18 | 2021 | 228 | 129.50 | 95.91  | 163.09 | 39.80  |
| 19 | 2021 | 163 | 134.25 | 123.59 | 144.91 | 12.48  |
| 20 | 2021 | 170 | 129.50 | 91.10  | 167.90 | 1.25   |
| 21 | 2021 | 179 | 139.25 | 116.03 | 162.47 | 10.18  |
| 22 | 2021 | 151 | 156.25 | 115.99 | 196.51 | -23.16 |
| 23 | 2021 | 141 | 135.75 | 107.33 | 164.17 | -14.11 |
| 24 | 2021 | 130 | 145.75 | 112.54 | 178.96 | -27.36 |
| 25 | 2021 | 148 | 156.00 | 129.31 | 182.69 | -18.99 |
| 26 | 2021 | 162 | 148.75 | 121.45 | 176.05 | -7.98  |
| 27 | 2021 | 143 | 164.25 | 138.58 | 189.92 | -24.71 |
| 28 | 2021 | 158 | 153.75 | 125.93 | 181.57 | -12.98 |
| 29 | 2021 | 139 | 142.00 | 124.52 | 159.48 | -12.84 |
| 30 | 2021 | 146 | 148.75 | 129.86 | 167.64 | -12.91 |
| 31 | 2021 | 159 | 164.00 | 116.39 | 211.61 | -24.86 |
| 32 | 2021 | 135 | 153.50 | 111.23 | 195.77 | -31.04 |
| 33 | 2021 | 138 | 145.50 | 104.14 | 186.86 | -26.15 |
| 34 | 2021 | 147 | 149.25 | 128.65 | 169.85 | -13.45 |
| 35 | 2021 | 146 | 138.25 | 126.46 | 150.04 | -2.69  |
| 36 | 2021 | 123 | 152.75 | 124.10 | 181.40 | -32.20 |
| 37 | 2021 | 115 | 138.75 | 132.47 | 145.03 | -20.71 |
| 38 | 2021 | 133 | 136.00 | 122.44 | 149.56 | -11.08 |
| 39 | 2021 | 148 | 143.25 | 115.53 | 170.97 | -13.44 |
| 40 | 2021 | 120 | 131.00 | 117.07 | 144.93 | -17.20 |
| 41 | 2021 | 131 | 135.75 | 131.00 | 140.50 | -6.76  |

|    |      |     |        |        |        |        |
|----|------|-----|--------|--------|--------|--------|
| 42 | 2021 | 127 | 127.50 | 115.00 | 140.00 | -9.28  |
| 43 | 2021 | 128 | 143.00 | 116.34 | 169.66 | -24.55 |
| 44 | 2021 | 140 | 131.75 | 96.90  | 166.60 | -15.96 |
| 45 | 2021 | 136 | 150.25 | 121.89 | 178.61 | -23.86 |
| 46 | 2021 | 143 | 156.75 | 125.61 | 187.89 | -23.89 |
| 47 | 2021 | 143 | 138.00 | 87.97  | 188.03 | -23.95 |
| 48 | 2021 | 155 | 126.25 | 87.07  | 165.43 | -6.30  |
| 49 | 2021 | 150 | 145.25 | 95.89  | 194.61 | -22.92 |
| 50 | 2021 | 190 | 148.75 | 75.48  | 222.02 | -14.42 |
| 51 | 2021 | 242 | 154.25 | 108.00 | 200.50 | 20.70  |
| 52 | 2021 | 283 | 173.75 | 102.02 | 245.48 | 15.28  |

156  
157  
158

159 **Table S3. Estimated all-cause excess mortality in 2020–2021.** Relative changes and expected deaths were  
 160 calculated based on 2016–2019 baseline mortality adjusted by deaths during measles outbreaks (October 2018 to  
 161 March 2019).

| Year  | Relative change level (%) | Nb. of weeks of excess | Adjusted expected deaths (2016–2019) <sup>1</sup> |                 | Reported deaths (2020–2021) |       | Sum death excesses |
|-------|---------------------------|------------------------|---------------------------------------------------|-----------------|-----------------------------|-------|--------------------|
|       |                           |                        | Mean                                              | Range (min-max) | Mean                        | Sum   |                    |
| 2020  | < 50                      | 14                     | 139                                               | 114-164         | 174                         | 2,442 | 297                |
| 2020  | ≥ 100                     | 2                      | 148                                               | 142-154         | 268                         | 536   | 195                |
| 2021  | < 50                      | 10                     | 129                                               | 114-139         | 177                         | 1,767 | 272                |
| 2021  | ≥ 100                     | 6                      | 132                                               | 118-150         | 277                         | 1,666 | 736                |
| Total |                           | 32                     | 137                                               | 114-164         | 200                         | 6,405 | 1,500              |

162 <sup>1</sup> Expected deaths were adjusted with deaths occurring during measles outbreak (October 2018-March 2019).  
 163 Nb=number

164  
 165

166 **Table S4: Contribution of deaths identified as COVID-19 and those associated with other causes of deaths to changes in life expectancy at birth between 2019 and**  
 167 **2020, and between 2020 and 2021.**

| Age group    | Males: e0(2020) – e0(2019) |                  | Females: e0(2020) – e0(2019) |                  | Males: e0(2021) – e0(2020) |                  | Females: e0(2021) – e0(2020) |                  |
|--------------|----------------------------|------------------|------------------------------|------------------|----------------------------|------------------|------------------------------|------------------|
|              | Covid-19 deaths            | All other causes | Covid-19 deaths              | All other causes | Covid-19 deaths            | All other causes | Covid-19 deaths              | All other causes |
| 0–1          | 0.00                       | 0.22             | -0.01                        | 0.07             | 0.00                       | 0.01             | 0.00                         | 0.06             |
| 1–4          | 0.00                       | 0.19             | 0.00                         | 0.44             | 0.00                       | 0.12             | 0.00                         | 0.03             |
| 5–14         | 0.00                       | 0.08             | 0.00                         | 0.21             | 0.00                       | 0.05             | 0.00                         | -0.06            |
| 15–34        | -0.02                      | 0.04             | -0.02                        | 0.04             | -0.04                      | 0.08             | -0.03                        | 0.09             |
| 35–59        | -0.13                      | 0.27             | -0.11                        | 0.09             | -0.31                      | 0.62             | -0.27                        | 0.13             |
| 60–79        | -0.17                      | -0.30            | -0.19                        | -0.10            | -0.48                      | -0.24            | -0.55                        | -0.11            |
| 80+          | -0.02                      | -0.04            | -0.03                        | -0.09            | -0.06                      | -0.09            | -0.14                        | 0.00             |
| <b>Total</b> | <b>-0.35</b>               | <b>0.45</b>      | <b>-0.36</b>                 | <b>0.66</b>      | <b>-0.90</b>               | <b>0.55</b>      | <b>-0.99</b>                 | <b>0.13</b>      |

168 The  $e_{xt}$  is the residual at age  $x$  and time  $t$ .
